# Supplementary material for: Syntheses and preclinical evaluations of 11 C-labeled radioligands for imaging brain orexin-1 and orexin-2 receptors with positron emission tomography
Source: Royal Society of Chemistry journal article supplement (doi:10.1039/d5md00382b), 2025-01-01
Supplement: d5md00382b1.pdf [file d5md00382b1.pdf]

# Syntheses and preclinical evaluations of <sup>11</sup>C-labeled radioligands for imaging brain orexin-1 and orexin-2 receptors with positron emission tomography

Susovan Jana,<sup>§a</sup> Pooyeh Ahmadi,<sup>§a</sup> Xuefeng Yan,<sup>a</sup> Ping Bai,<sup>b</sup> Jeih-San Liow,<sup>a</sup> Adrian E. Jenson,<sup>a</sup> Matilah T. Pamie-George,<sup>a</sup> Sami S. Zoghbi,<sup>a</sup> Shawn Wu,<sup>a</sup> Changning Wang,<sup>b</sup> Robert B. Innis,<sup>a</sup> Victor W. Pike,<sup>a\*</sup> and Sanjay Telu<sup>a\*</sup>

<sup>a</sup>Molecular Imaging Branch, National Institute of Mental Health, National Institutes of Health, Bethesda, MD 20892-1003, USA.

<sup>b</sup>Athinoula A. Martinos Center for Biomedical Imaging, Massachusetts General Hospital, Harvard Medical School, Charlestown, MA 02129, USA.

\* Corresponding author email: telus@mail.nih.gov; pikev@mail.nih.gov

## Table of Contents

| Topic                                                                                                                                                  | Page (s) |
|--------------------------------------------------------------------------------------------------------------------------------------------------------|----------|
| Figure S1. Semi-preparative HPLC chromatogram for crude [ <sup>11</sup> C] <i>N</i> -Boc-GSK1059865                                                    | S2       |
| Figure S2. Analytical HPLC chromatogram for reference compound GSK1059865 ( <b>1</b> )                                                                 | S2       |
| Figure S3. Analytical HPLC chromatogram of formulated [ <sup>11</sup> C]GSK1059865 ([ <sup>11</sup> C] <b>1</b> )                                      | S3       |
| Figure S4. Calibration curve for the determination of molar activity ( <i>A<sub>m</sub></i> ) of [ <sup>11</sup> C]GSK1059865                          | S4       |
| Figure S5. HPLC chromatogram from co-injection of formulated [ <sup>11</sup> C]GSK1059865 ([ <sup>11</sup> C] <b>1</b> ) and GSK1059865 ( <b>1</b> )   | S4       |
| Figure S6. Determination of 1-hour time stability of formulated [ <sup>11</sup> C]GSK1059865 ([ <sup>11</sup> C] <b>1</b> )                            | S5       |
| Figure S7. LC–MS spectrum of formulated [ <sup>11</sup> C]GSK1059865 ([ <sup>11</sup> C] <b>1</b> )                                                    | S6       |
| Figure S8. LC–MS/MS spectrum of formulated [ <sup>11</sup> C]GSK1059865 ([ <sup>11</sup> C] <b>1</b> )                                                 | S7       |
| Figure S9. Semi-preparative HPLC chromatogram for crude [ <sup>11</sup> C]ET1 ([ <sup>11</sup> C] <b>2</b> )                                           | S8       |
| Figure S10. Analytical HPLC chromatogram for reference compound ET1 ( <b>2</b> )                                                                       | S8       |
| Figure S11. Analytical HPLC chromatogram of formulated [ <sup>11</sup> C]ET1 ([ <sup>11</sup> C] <b>2</b> )                                            | S9       |
| Figure S12. Calibration curve for the determination of molar activity ( <i>A<sub>m</sub></i> ) of [ <sup>11</sup> C]ET1 ([ <sup>11</sup> C] <b>2</b> ) | S10      |
| Figure S13. HPLC chromatogram from co-injection of formulated [ <sup>11</sup> C]ET1 ([ <sup>11</sup> C] <b>2</b> ) and ET1 ( <b>2</b> )                | S10      |
| Figure S14. Determination of 1-hour time stability of formulated [ <sup>11</sup> C]ET1 ([ <sup>11</sup> C] <b>2</b> )                                  | S11      |
| Figure S15. LC–MS spectrum of formulated [ <sup>11</sup> C]ET1 ([ <sup>11</sup> C] <b>2</b> )                                                          | S12      |
| Figure S16. LC–MS/MS spectrum of formulated [ <sup>11</sup> C]ET1 ([ <sup>11</sup> C] <b>2</b> )                                                       | S13      |
| Table S1. <i>V<sub>T</sub></i> values for all monkey brain regions under baseline (BL) and preblock (BLK) conditions with [ <sup>11</sup> C] <b>1</b>  | S14      |
| Table S2. <i>V<sub>T</sub></i> values for all monkey brain regions under baseline (BL) and preblock (BLK) conditions with [ <sup>11</sup> C] <b>2</b>  | S14      |

## Radio-HPLC chromatograms

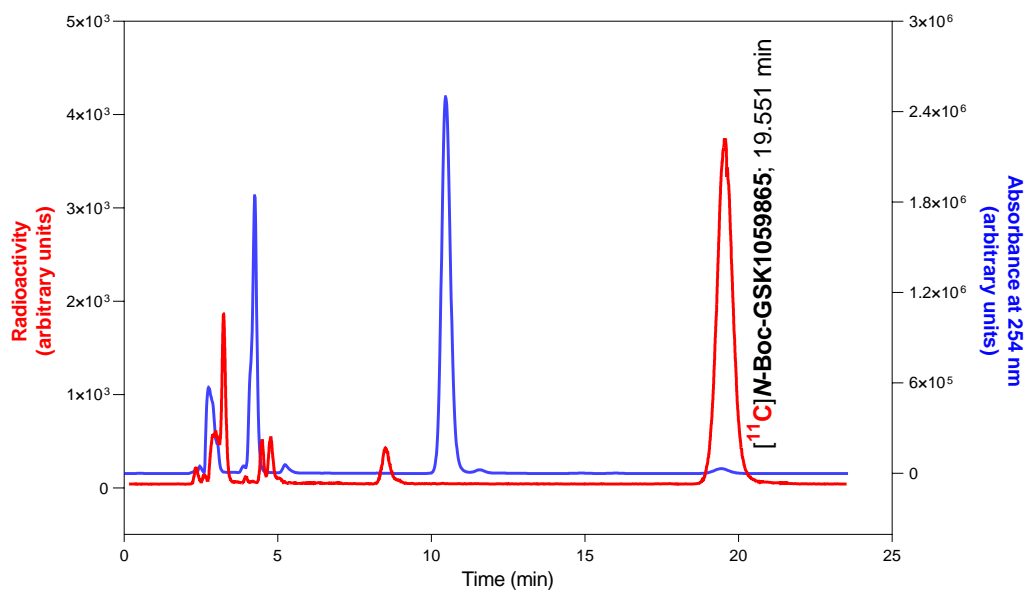

**Figure S1.** Semi-preparative HPLC chromatogram for crude [<sup>11</sup>C]N-Boc-GSK1059865.

**Method:** Reversed phase column (Luna C18, 10 μm, 100 Å, 250 mm × 10 mm i.d.; Phenomenex) eluted isocratically at 6.0 mL/min with 0.1% TFA in H<sub>2</sub>O (A)–MeCN (B) (32% A–68% B) and with the eluate monitored for radioactivity and for absorbance at 254 nm.

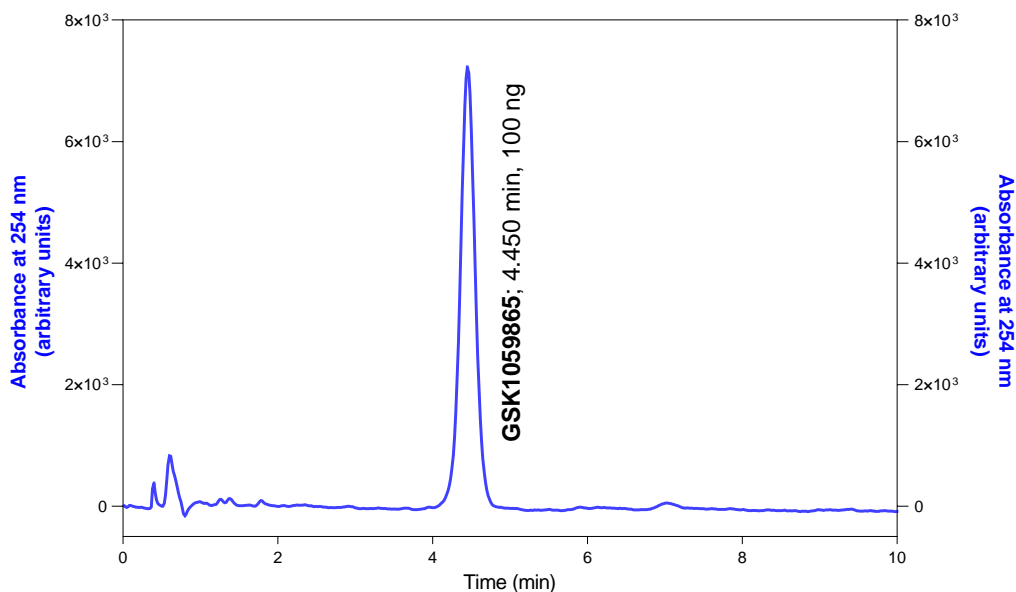

**Figure S2.** Analytical HPLC chromatogram for reference compound GSK1059865 (**1**).

**Method:** Reversed phase column (Luna C18, 10 μm, 100 Å, 250 mm × 4.6 mm i.d.; Phenomenex) eluted isocratically at 3.0 mL/min with H<sub>2</sub>O (A)–MeCN (B) (40% A–60% B) and with the eluate monitored for absorbance at 254 nm.

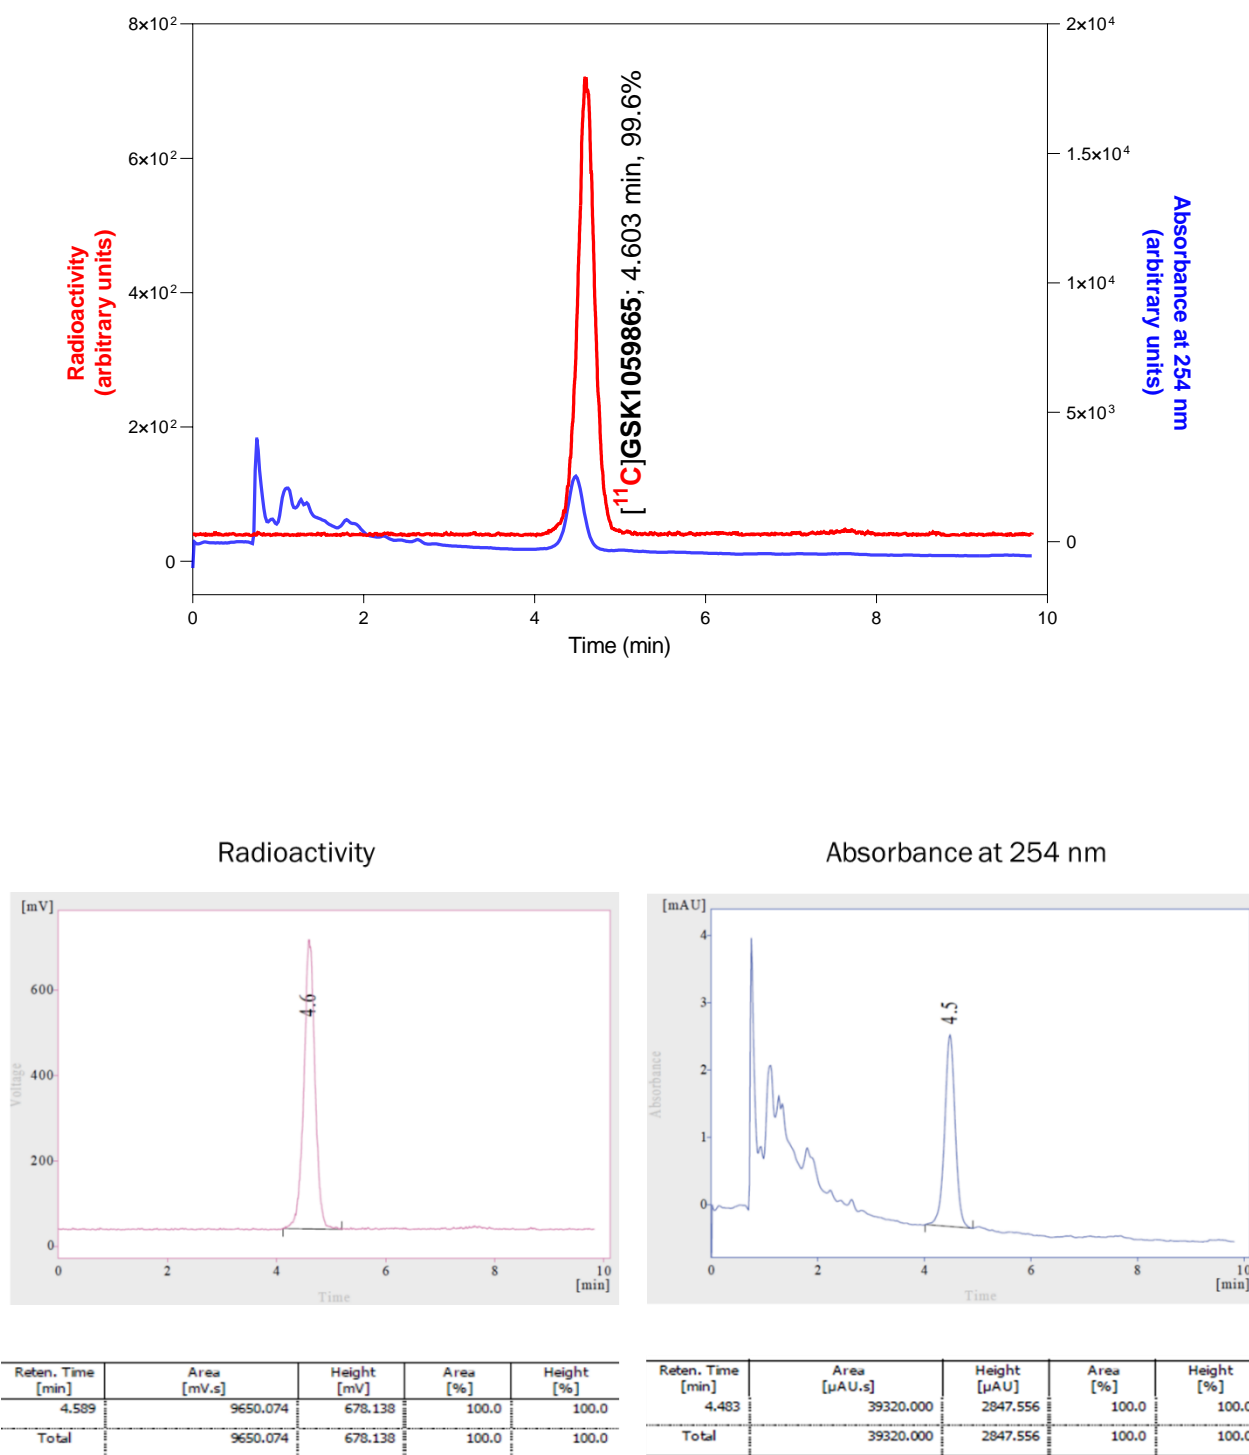

**Figure S3.** Analytical HPLC chromatogram of formulated [ $^{11}\text{C}$ ]GSK1059865 ([ $^{11}\text{C}$ ]1).

**Method:** Reversed phase column (Luna C18, 10  $\mu\text{m}$ , 100  $\text{\AA}$ , 250 mm  $\times$  4.6 mm i.d.; Phenomenex) eluted isocratically at 3.0 mL/min with  $\text{H}_2\text{O}$  (A)–MeCN (B) (40% A–60% B) and with the eluate monitored for radioactivity and absorbance at 254 nm. Radioactivity injected = 0.0225 GBq.

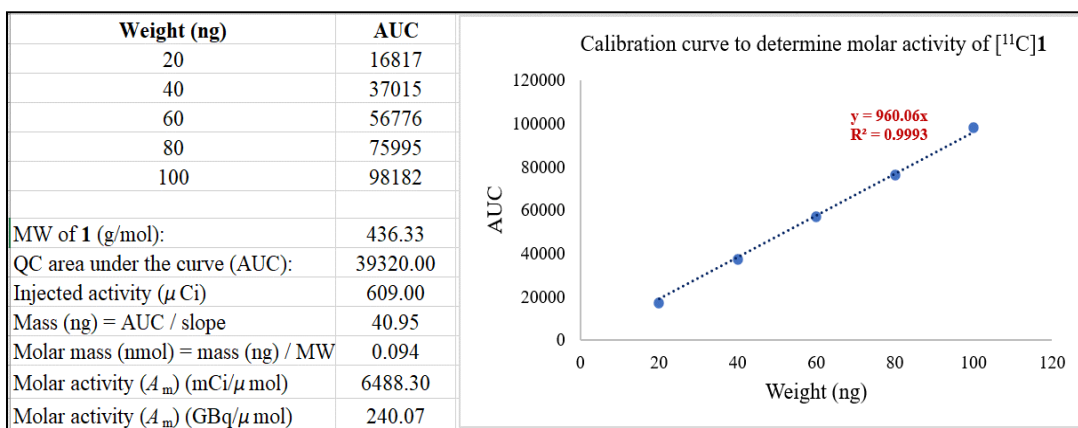

**Figure S4.** Calibration curve for the determination of molar activity ( $A_m$ ) of [ $^{11}\text{C}$ ]GSK1059865 ([ $^{11}\text{C}$ ]**1**).

**Procedure:** 1.00 mg of reference GSK1059865 (**1**) was dissolved in 10 mL MeCN (Stock # 1: 0.1 mg/mL); 100  $\mu\text{L}$  (10  $\mu\text{g}$ ) of stock # 1 was diluted to 10 mL with MeCN/H<sub>2</sub>O (1: 1, v/v) to obtain stock # 2 with the concentration of **1** as 1.0  $\mu\text{g/mL}$  (or 1 ng/ $\mu\text{L}$ ). Samples of stock #2 [20  $\mu\text{L}$  (20 ng), 40  $\mu\text{L}$  (40 ng), 60  $\mu\text{L}$  (60 ng), 80  $\mu\text{L}$  (80 ng) and 100  $\mu\text{L}$  (100 ng)] were injected successively onto a reversed phase column (Luna C18, 10  $\mu\text{m}$ , 100  $\text{\AA}$ , 250 mm  $\times$  4.6 mm i.d.; Phenomenex) eluted isocratically at 3.0 mL/min with H<sub>2</sub>O (A)–MeCN (B) (40% A–60% B) and with the eluate monitored for absorbance at 254 nm. Retention time ( $t_R$ ) of **1** = 4.45 min.

$$\text{Mass of carrier} = \frac{\left(\frac{39320}{960}\right) \text{ ng}}{436.33 \text{ g/mol}} = 0.094 \text{ nmol}; \quad \text{Molar Activity } (A_m) = \frac{0.0225 \text{ GBq}}{0.094 \text{ nmol}} = 240 \text{ GBq}/\mu\text{mol} \text{ at EOS}$$

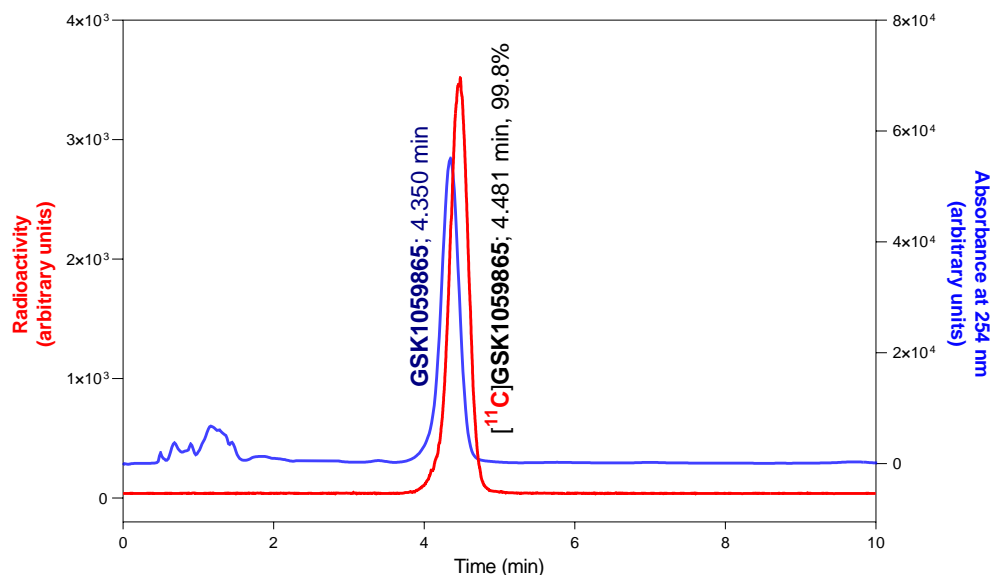

**Figure S5.** HPLC chromatogram from co-injection of formulated [ $^{11}\text{C}$ ]GSK1059865 ([ $^{11}\text{C}$ ]**1**) and GSK1059865 (**1**).

**Method:** Reversed phase column (Luna C18, 10  $\mu\text{m}$ , 100  $\text{\AA}$ , 250 mm  $\times$  4.6 mm i.d.; Phenomenex) eluted isocratically at 3.0 mL/min with H<sub>2</sub>O (A)–MeCN (B) (40% A–60% B) and with the eluate monitored for radioactivity and absorbance at 254 nm.

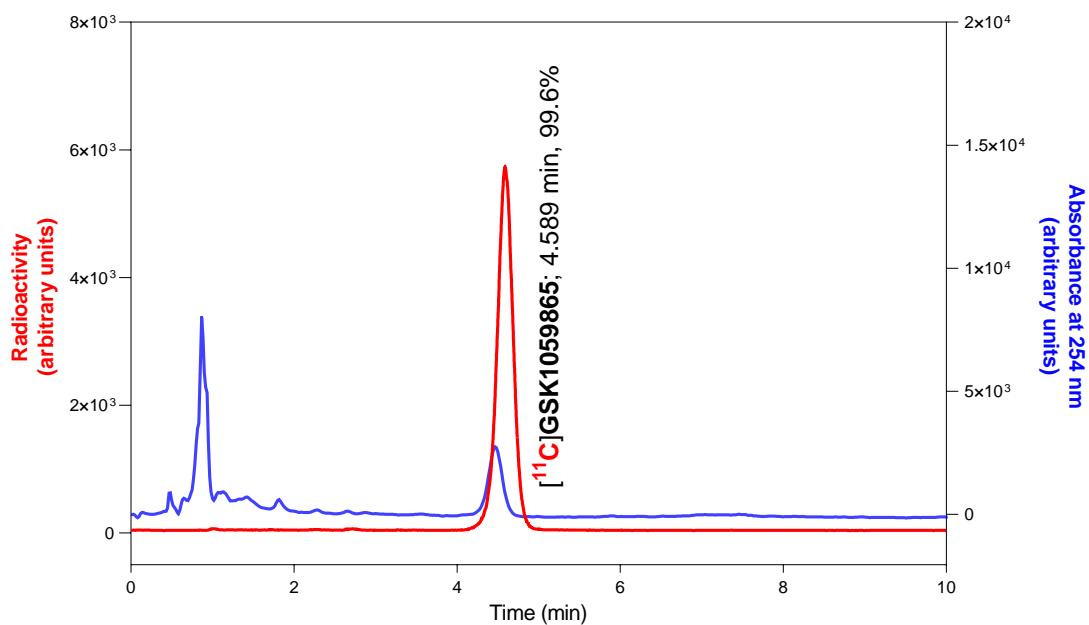

**Figure S6.** Determination of 1-hour time stability of formulated [ $^{11}\text{C}$ ]GSK1059865 ([ $^{11}\text{C}$ ]1).

**Method:** Reversed phase column (Luna C18, 10  $\mu\text{m}$ , 100  $\text{\AA}$ , 250 mm  $\times$  4.6 mm i.d.; Phenomenex) eluted isocratically at 3.0 mL/min with  $\text{H}_2\text{O}$  (A)–MeCN (B) (40% A–60% B) and with the eluate monitored for radioactivity and absorbance at 254 nm.

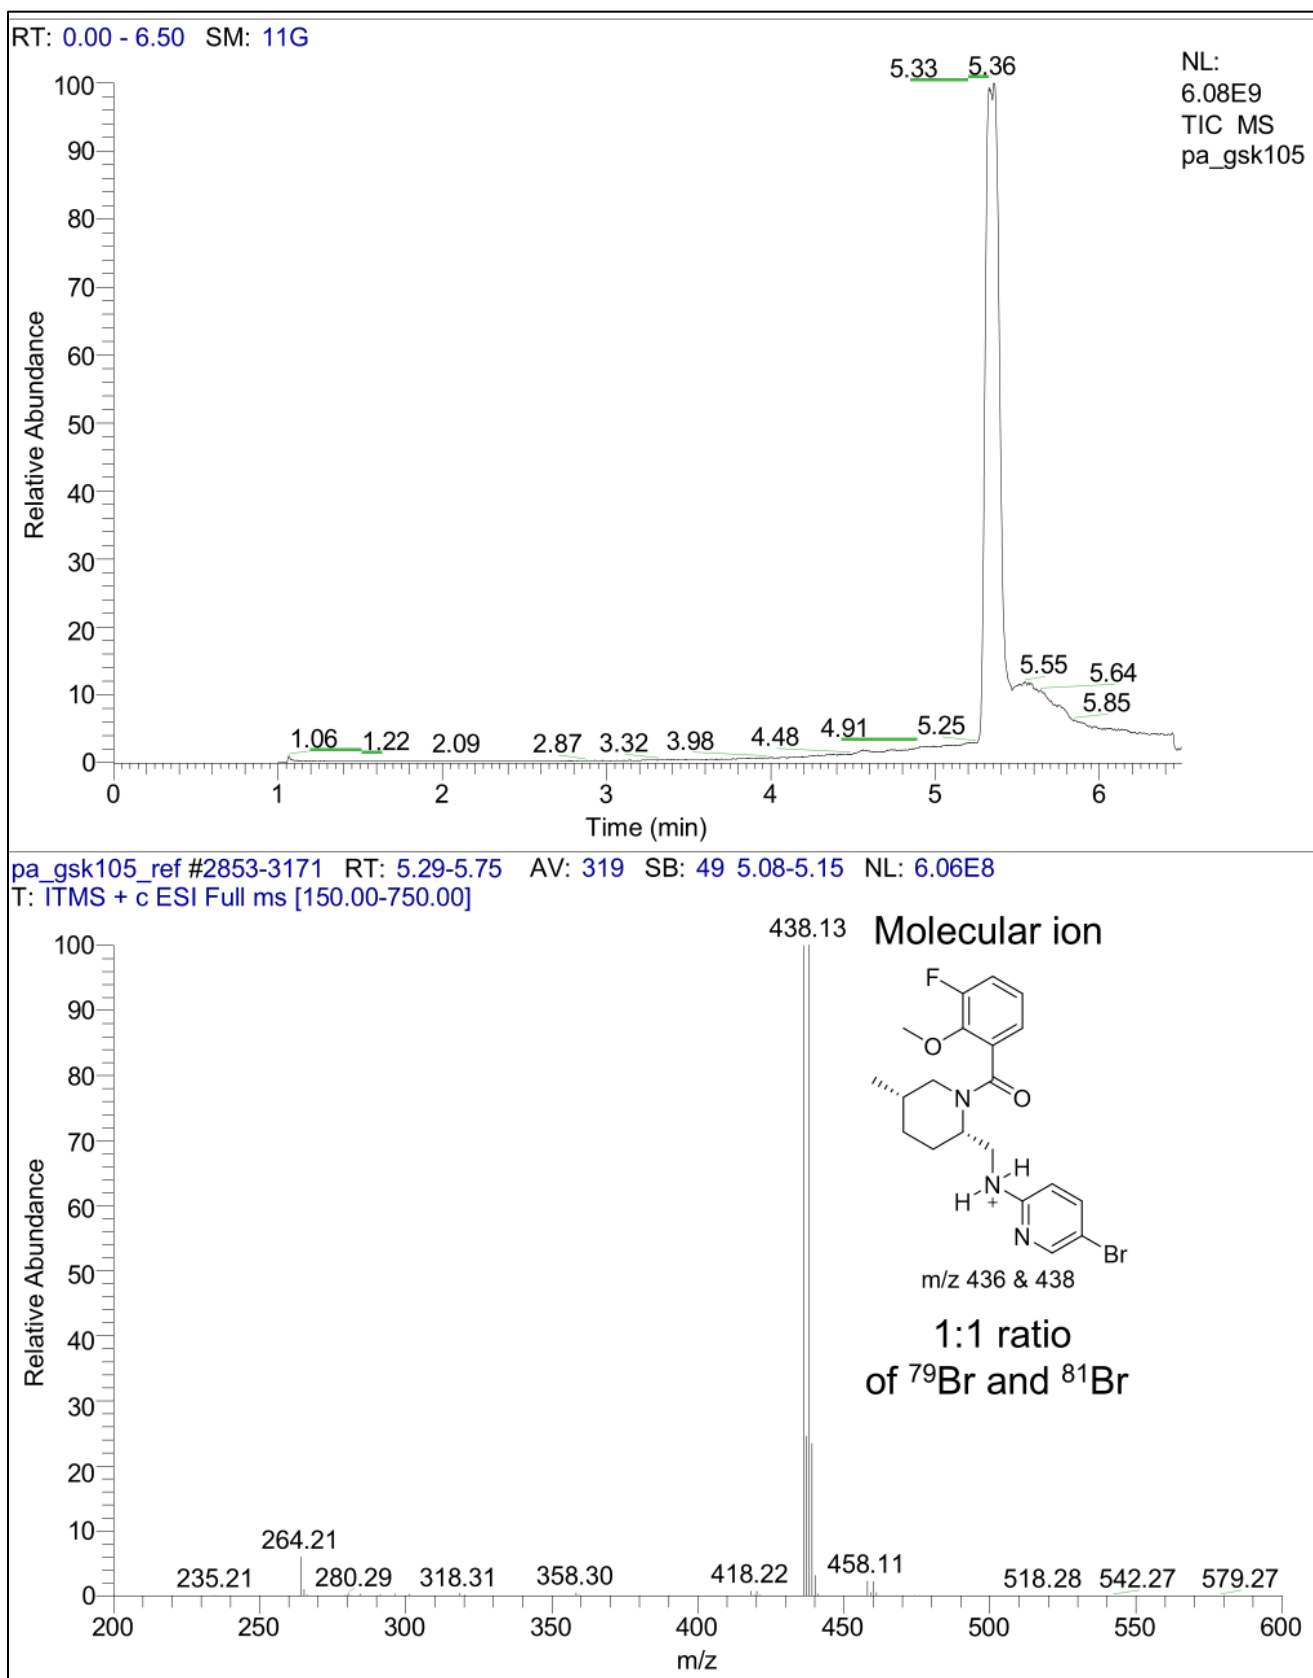

**Figure S7.** LC-MS spectrum of formulated [ $^{11}\text{C}$ ]GSK1059865 ([ $^{11}\text{C}$ ]1).

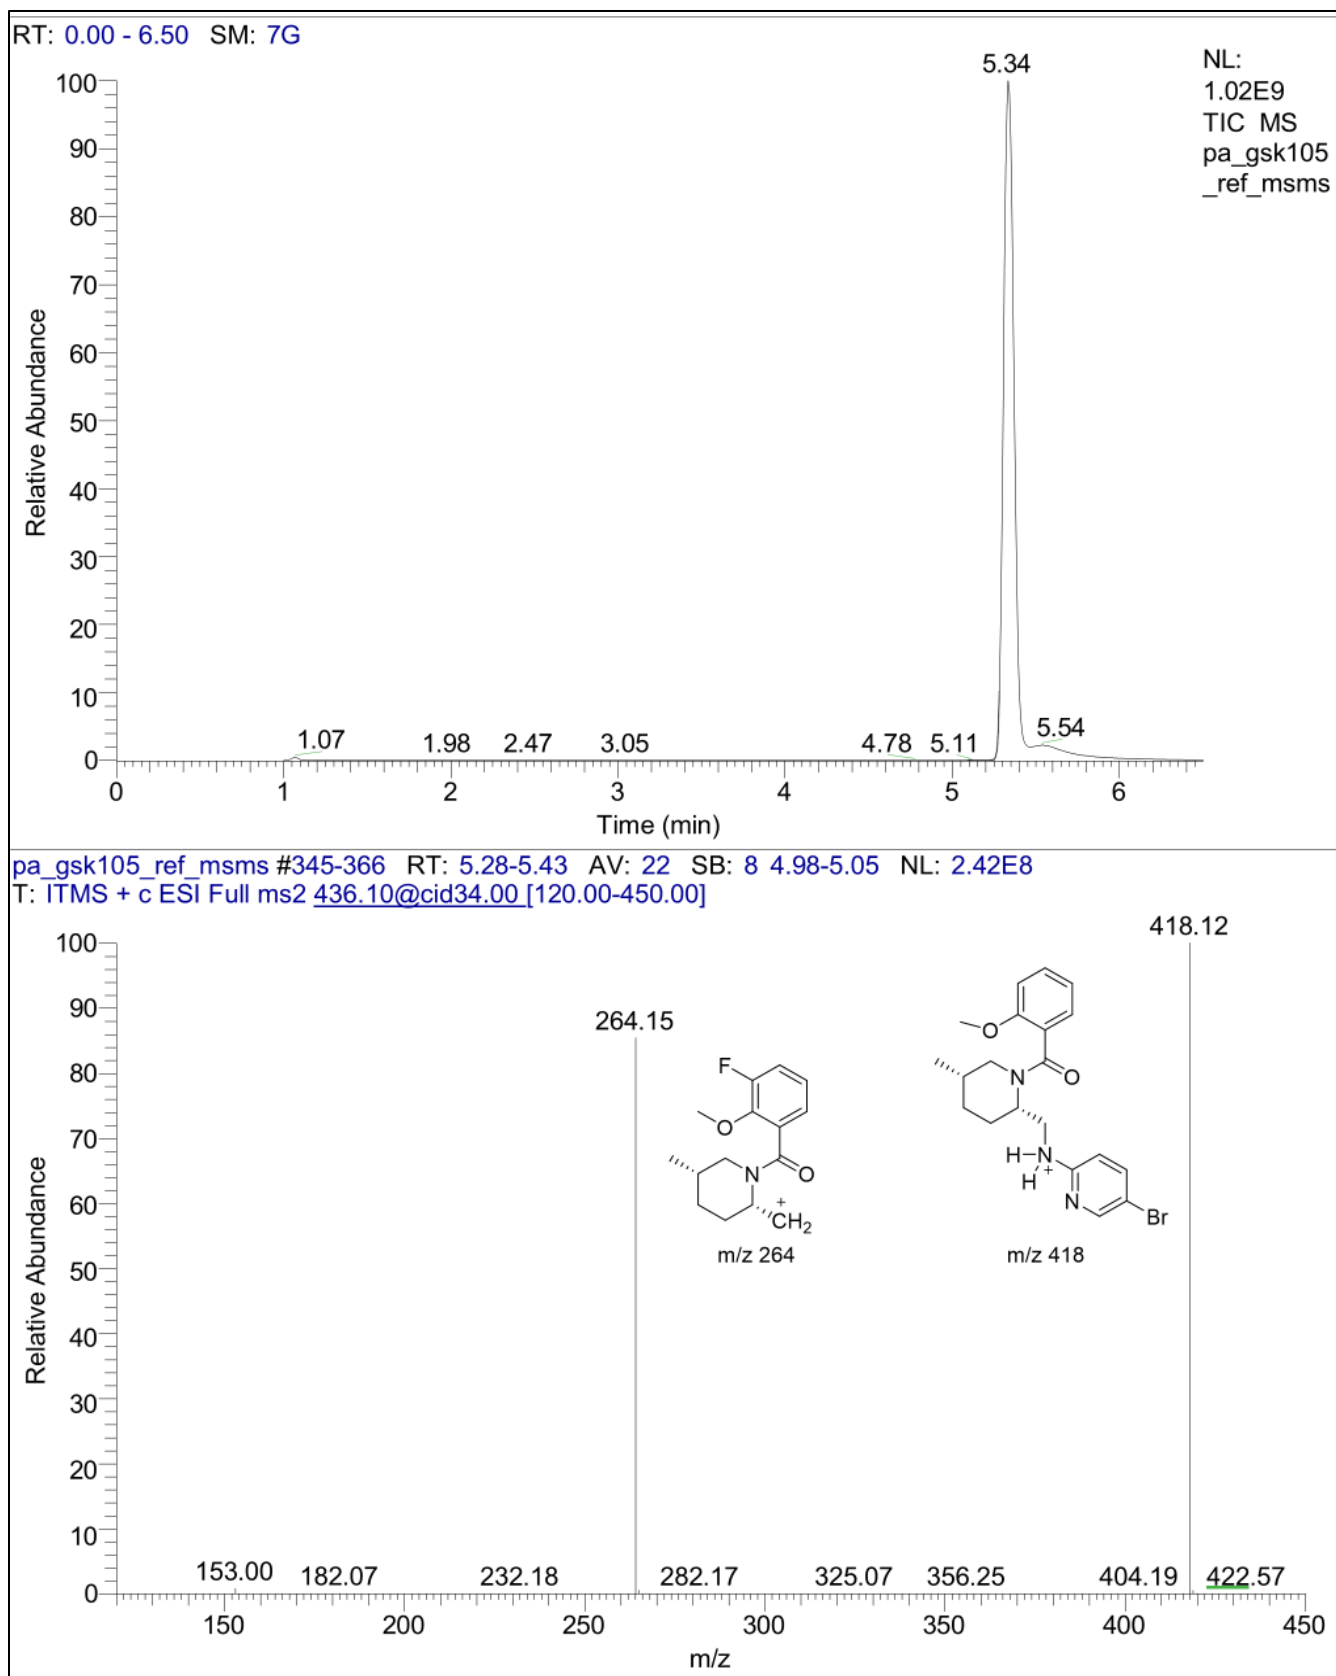

**Figure S8.** LC-MS/MS spectrum of formulated [ $^{11}\text{C}$ ]GSK1059865 ([ $^{11}\text{C}$ ]1).

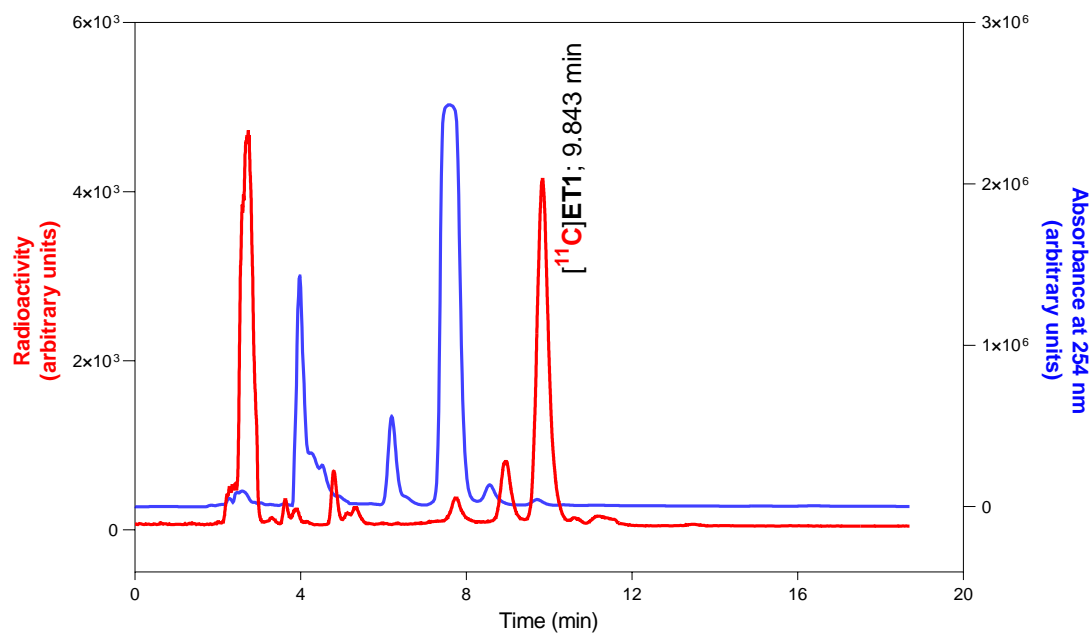

**Figure S9.** Semi-preparative HPLC chromatogram for crude  $[^{11}\text{C}]\text{ET1}$  ( $[^{11}\text{C}]\text{2}$ ).

**Method:** Reversed phase column (Luna C18, 10  $\mu\text{m}$ , 100  $\text{\AA}$ , 250 mm  $\times$  10 mm i.d.; Phenomenex) eluted isocratically at 6.0 mL/min with 0.1 M aq.  $\text{HCOONH}_4$  (A)–MeCN (B) (43% A–57% B) and with the eluate monitored for radioactivity and absorbance at 254 nm.

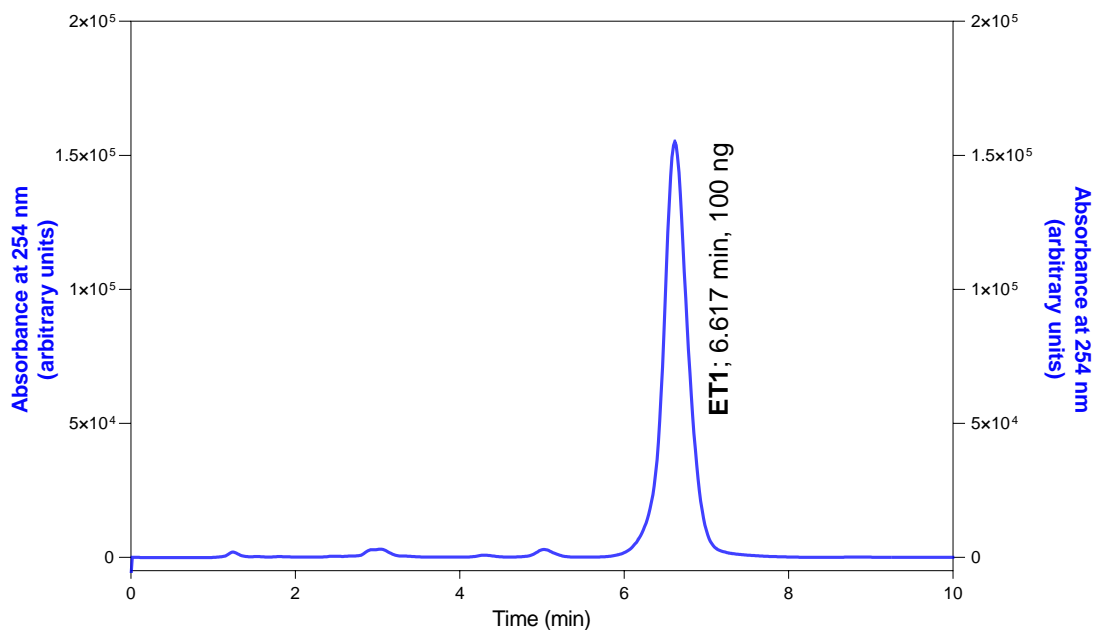

**Figure S10.** Analytical HPLC chromatogram for reference compound ET1 (**2**).

**Method:** Reversed phase column (Luna C18, 10  $\mu\text{m}$ , 100  $\text{\AA}$ , 250 mm  $\times$  4.6 mm i.d.; Phenomenex) eluted isocratically at 2.0 mL/min with 0.1 M aq.  $\text{HCOONH}_4$  (A)–MeCN (B) (45% A–55% B) and with the eluate monitored for absorbance at 254 nm.



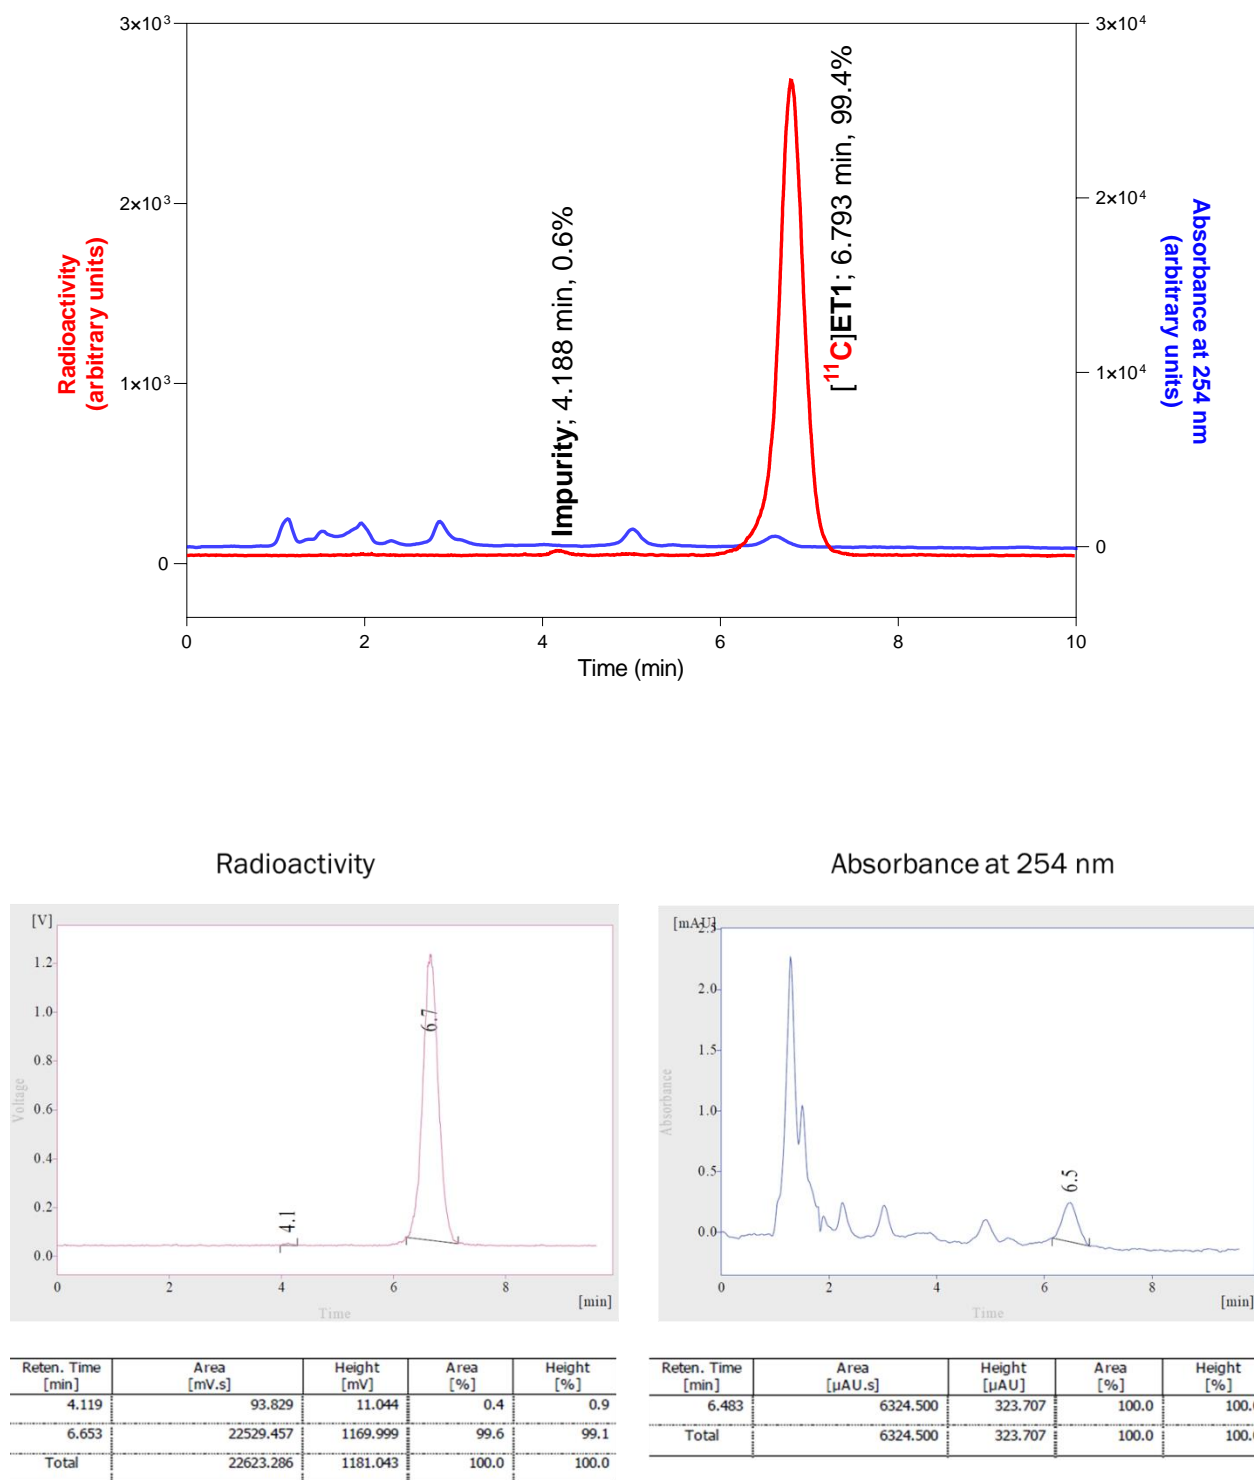

**Figure S11.** Analytical HPLC chromatogram of formulated [ $^{11}\text{C}$ ]ET1 ([ $^{11}\text{C}$ ]2).

**Method:** Reversed phase column (Luna C18, 10  $\mu\text{m}$ , 100 Å, 250 mm  $\times$  4.6 mm i.d.; Phenomenex) eluted isocratically at 2.0 mL/min with 0.1 M aq.  $\text{HCOONH}_4$  (A)–MeCN (B) (45% A–55% B) and with the eluate monitored for radioactivity and absorbance at 254 nm. Radioactivity injected = 0.00645 GBq.

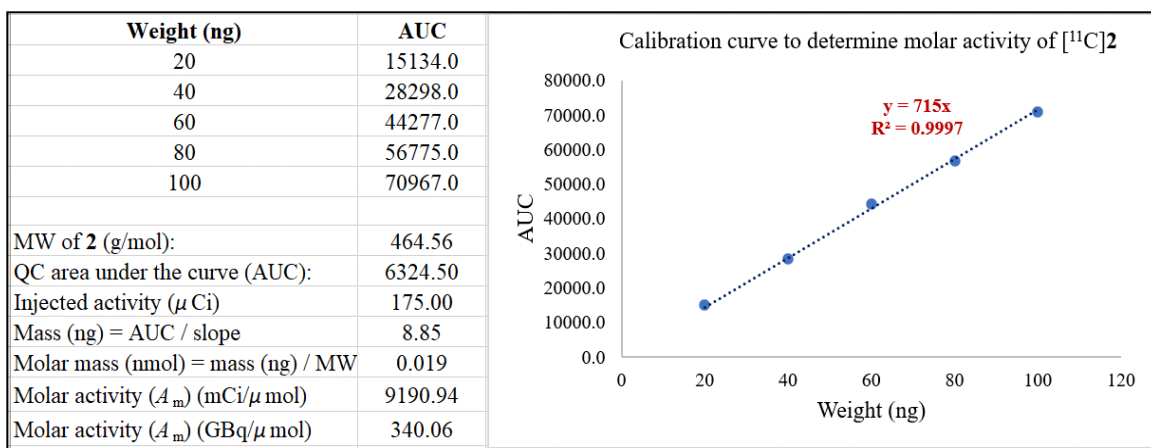

**Figure S12.** Calibration curve for the determination of molar activity ( $A_m$ ) of [ $^{11}\text{C}$ ]ET1 ([ $^{11}\text{C}$ ]**2**).

**Procedure:** 1.00 mg of reference ET1 (**2**) was dissolved in 10 mL MeCN (Stock # 1: 0.1 mg/mL); 100  $\mu\text{L}$  (10  $\mu\text{g}$ ) of stock # 1 was diluted to 10 mL with MeCN/ $\text{H}_2\text{O}$  (1: 1, v/v) to obtain stock # 2: with a concentration of **2** at 1.0  $\mu\text{g/mL}$  (1 ng/ $\mu\text{L}$ ). Samples of stock#2 [20  $\mu\text{L}$  (20 ng), 40  $\mu\text{L}$  (40 ng), 60  $\mu\text{L}$  (60 ng), 80  $\mu\text{L}$  (80 ng) and 100  $\mu\text{L}$  (100 ng)] were injected successively onto a reversed phase column (Luna C18, 10  $\mu\text{m}$ , 100  $\text{\AA}$ , 250 mm  $\times$  4.6 mm i.d.; Phenomenex) eluted isocratically at 2.0 mL/min with 0.1 M aq.  $\text{HCOONH}_4$  (A)–MeCN (B) (45% A–55% B) and with the eluate monitored for absorbance at 254 nm. Retention time ( $t_R$ ) of **2** = 6.62 min.

$$\text{Mass of carrier} = \frac{\left(\frac{6324.5}{715}\right) \text{ ng}}{464.56 \text{ g/mol}} = 0.019 \text{ nmol}; \text{ Molar Activity } (A_m) = \frac{0.00645 \text{ GBq}}{0.019 \text{ nmol}} = 340 \text{ GBq}/\mu\text{mol at EOS}$$

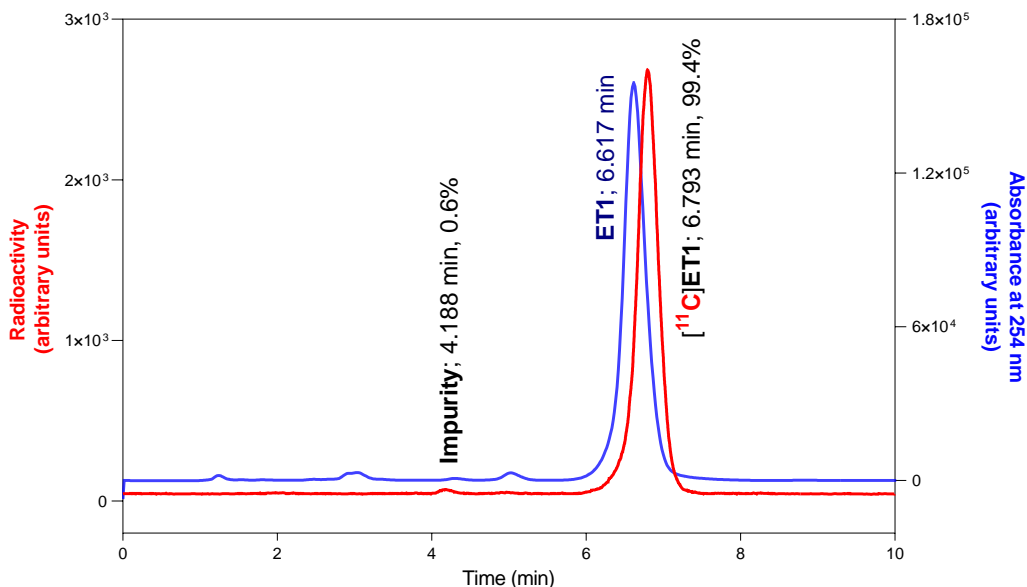

**Figure S13.** HPLC chromatogram from co-injection of formulated [ $^{11}\text{C}$ ]ET1 ([ $^{11}\text{C}$ ]**2**) and ET1 (**2**).

**Method:** Reversed phase column (Luna C18, 10  $\mu\text{m}$ , 100  $\text{\AA}$ , 250 mm  $\times$  4.6 mm i.d.; Phenomenex) eluted isocratically at 2.0 mL/min with 0.1 M aq.  $\text{HCOONH}_4$  (A)–MeCN (B) (45% A–55% B) and with the eluate monitored for radioactivity and absorbance at 254 nm.

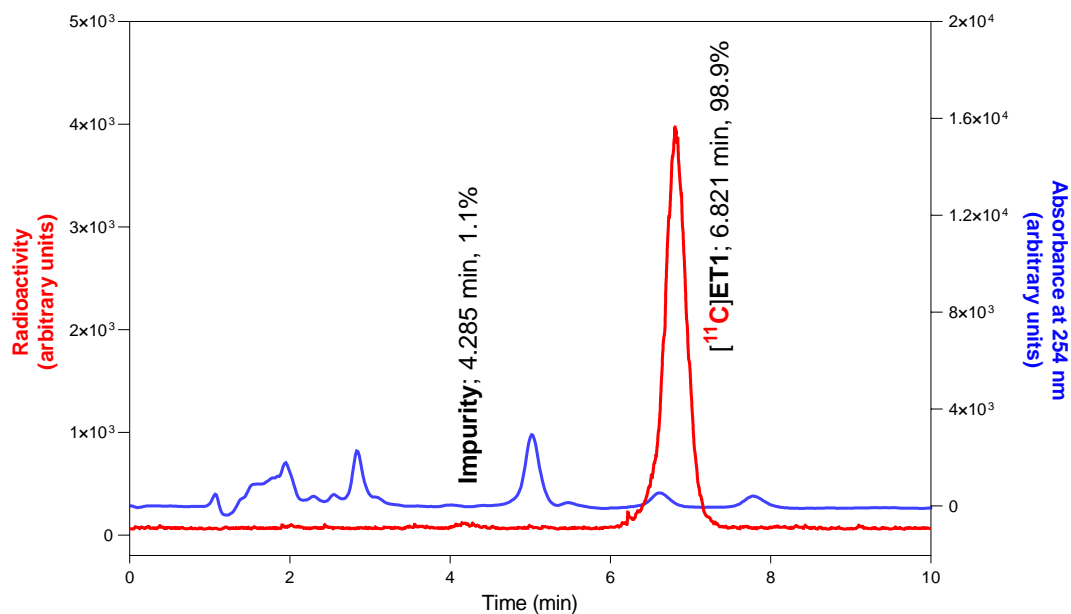

**Figure S14.** Determination of 1-hour time stability of formulated  $[^{11}\text{C}]\text{ET1}$  ( $[^{11}\text{C}]\text{2}$ ).

**Method:** Reversed phase column (Luna C18, 10  $\mu\text{m}$ , 100  $\text{\AA}$ , 250 mm  $\times$  4.6 mm i.d.; Phenomenex) eluted isocratically at 2.0 mL/min with 0.1 M aq.  $\text{HCOONH}_4$  (A)–MeCN (B) (45% A–55% B) and with the eluate monitored for radioactivity and absorbance at 254 nm.

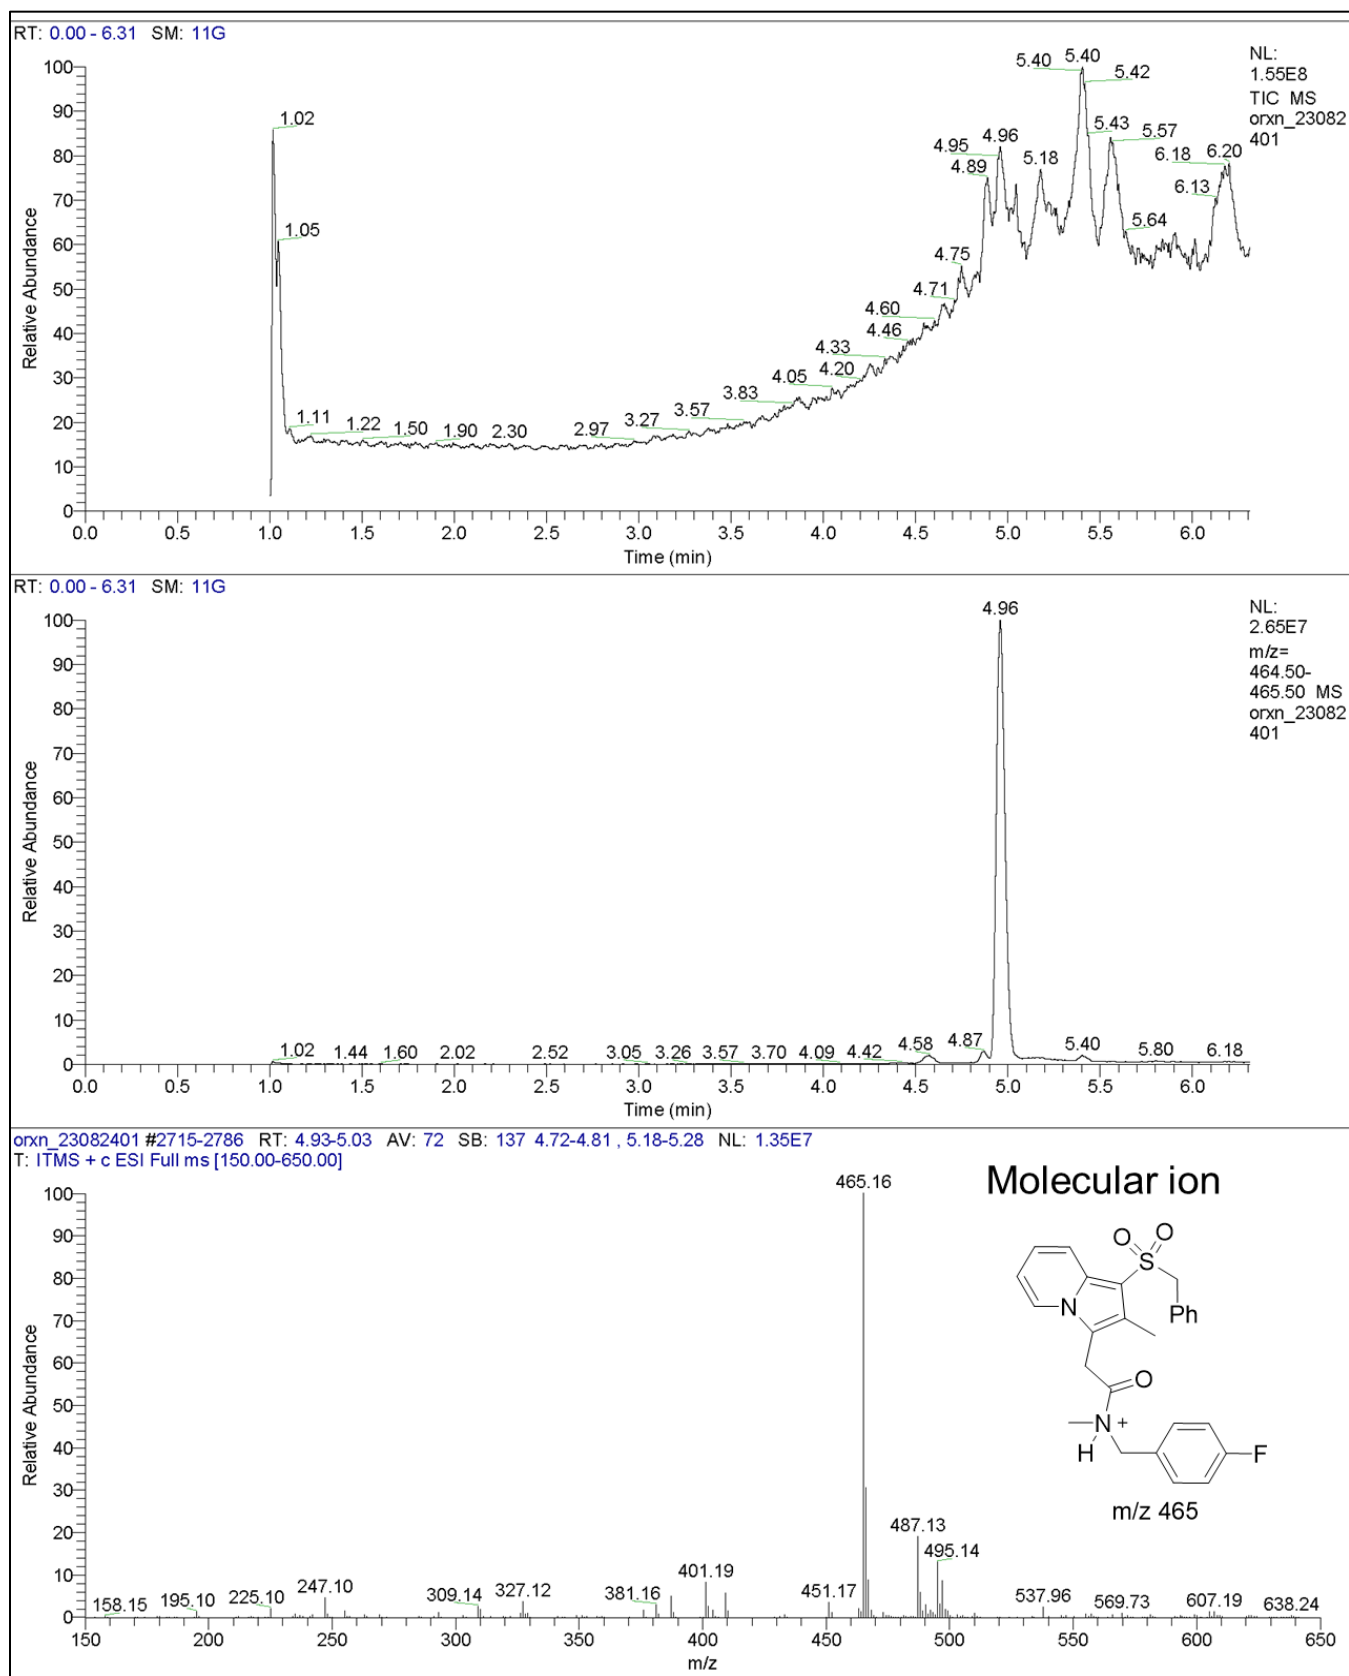

**Figure S15.** LC-MS spectrum of formulated [ $^{11}\text{C}$ ]ET1 ([ $^{11}\text{C}$ ]2).

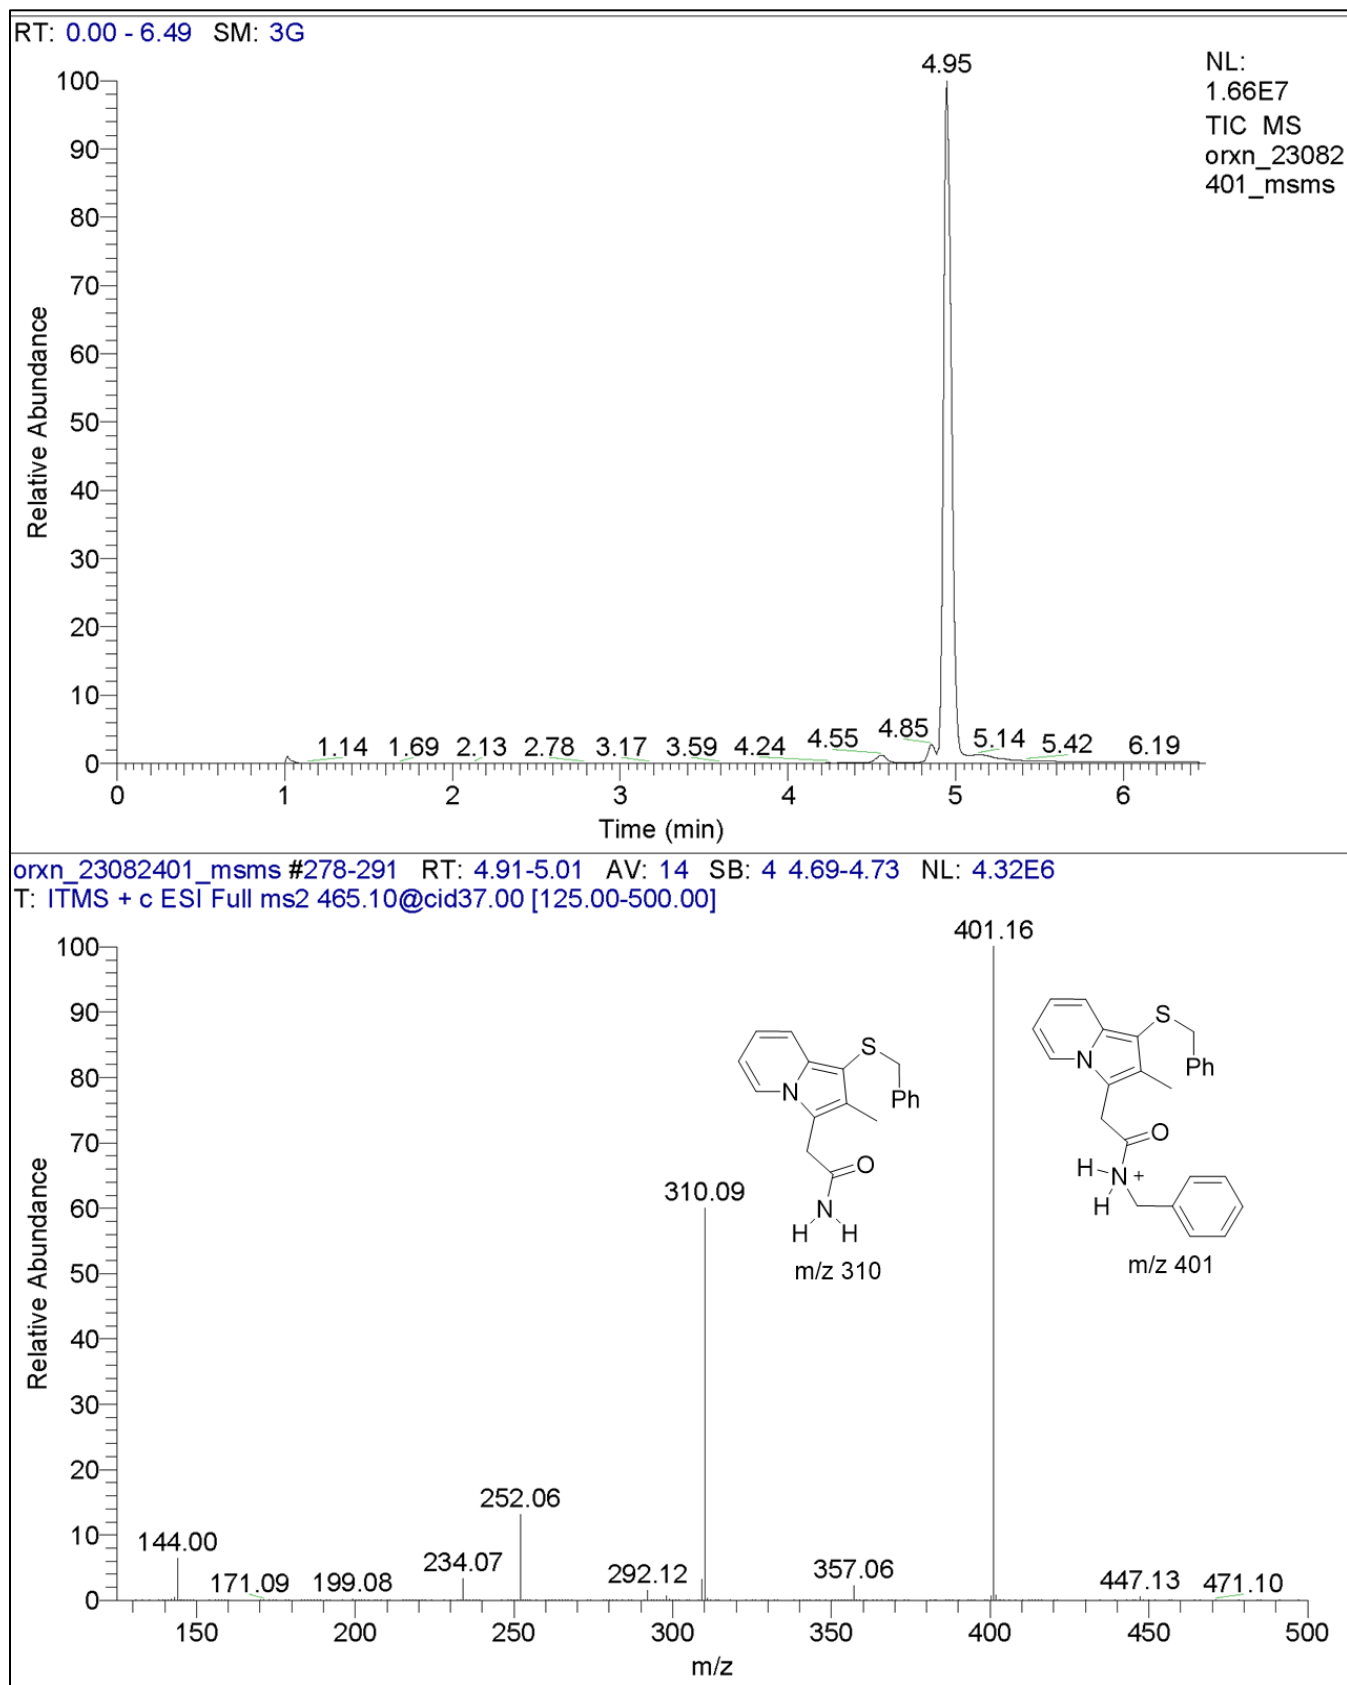

**Figure S16.** LC-MS/MS spectrum of formulated [ $^{11}\text{C}$ ]ET1 ([ $^{11}\text{C}$ ]2).

**Table S1.**  $V_T$  values for all monkey brain regions under baseline (BL) and preblock (BLK) conditions with [ $^{11}\text{C}$ ]1.

| Brain region          | $V_T$ [mL/cm <sup>3</sup> ] BL | $V_T$ [mL/cm <sup>3</sup> ] BLK<br>(suvorexant, 0.5 mg/kg) | Increase (%) |
|-----------------------|--------------------------------|------------------------------------------------------------|--------------|
| Whole brain (WB)      | 0.56                           | 0.83                                                       | 48           |
| Frontal cortex (FC)   | 0.55                           | 0.83                                                       | 51           |
| Cingulate cortex (AC) | 0.58                           | 0.85                                                       | 47           |
| Striatum (ST)         | 0.57                           | 0.84                                                       | 47           |
| Insula (Insul)        | 0.55                           | 0.83                                                       | 51           |
| Temporal cortex (TE)  | 0.55                           | 0.82                                                       | 49           |
| Amygdala (Amy)        | 0.56                           | 0.81                                                       | 45           |
| Hippocampus (HP)      | 0.58                           | 0.84                                                       | 45           |
| Thalamus (TH)         | 0.58                           | 0.87                                                       | 50           |
| Parietal cortex (PA)  | 0.58                           | 0.82                                                       | 41           |
| Occipital cortex (OC) | 0.59                           | 0.84                                                       | 42           |
| Cerebellum (CE)       | 0.57                           | 0.84                                                       | 47           |
| Hypothalamus (HY)     | 0.58                           | 0.81                                                       | 40           |
| Pons (Pons)           | 0.61                           | 0.89                                                       | 46           |
| Midbrain (MB)         | 0.62                           | 0.87                                                       | 40           |
| Average               |                                |                                                            | 46           |

**Table S2.**  $V_T$  values for all monkey brain regions under baseline (BL) and preblock (BLK) conditions with [ $^{11}\text{C}$ ]2.

| Brain regions         | $V_T$ [mL/cm <sup>3</sup> ] BL | $V_T$ [mL/cm <sup>3</sup> ] BLK<br>(suvorexant, 0.5 mg/kg) | Increase (%) |
|-----------------------|--------------------------------|------------------------------------------------------------|--------------|
| Whole brain (WB)      | 1.25                           | 1.45                                                       | 16           |
| Frontal cortex (FC)   | 1.29                           | 1.50                                                       | 16           |
| Cingulate cortex (AC) | 1.27                           | 1.38                                                       | 9            |
| Striatum (ST)         | 1.22                           | 1.40                                                       | 14           |
| Insula (Insul)        | 1.21                           | 1.42                                                       | 18           |
| Temporal cortex (TE)  | 1.27                           | 1.52                                                       | 20           |
| Amygdala (Amy)        | 1.23                           | 1.43                                                       | 17           |
| Hippocampus (HP)      | 1.16                           | 1.36                                                       | 17           |
| Thalamus (TH)         | 1.16                           | 1.33                                                       | 15           |
| Parietal cortex (PA)  | 1.24                           | 1.43                                                       | 15           |
| Occipital cortex (OC) | 1.26                           | 1.49                                                       | 19           |
| Cerebellum (CE)       | 1.22                           | 1.35                                                       | 11           |
| Average               |                                |                                                            | 15           |
